# Supplementary material for: The Increase of Triterpene Saponin Production Induced by Trans-Anethole in Hairy Root Cultures of Panax quinquefolium
Source: PubMed Central journal article supplement (PMC6222429; doi:10.3390/molecules23102674), 2018-10-17
Supplement: molecules-23-02674-s001.pdf [file molecules-23-02674-s001.pdf]

# The increase of triterpene saponin production induced by trans-anethole in hairy root cultures of *Panax quinquefolium*

Ewa Kochan <sup>1,\*</sup>, Piotr Szymczyk <sup>1</sup>, Łukasz Kuźma <sup>2</sup>, Grażyna Szymańska <sup>1</sup>, Anna Wajs-Bonikowska <sup>3</sup>, Radosław Bonikowski <sup>3</sup>, Monika Sienkiewicz <sup>4</sup>

<sup>1</sup> Pharmaceutical Biotechnology Department, Medical University of Lodz, Muszyńskiego 1, Lodz 90-151, Poland; ewa.kochan@umed.lodz.pl (E.K.); piotr.szymczyk@umed.lodz.pl (P.S.); grazyna.szymanska@umed.lodz.pl (G.S.)

<sup>2</sup> Department of Biology and Pharmaceutical Botany, Medical University of Lodz, Muszyńskiego 1, Lodz 90-151, Poland; lukasz.kuzma@umed.lodz.pl

<sup>3</sup> Institute of General Food Chemistry, Biotechnology and Food Science, Lodz University of Technology, Stefanowskiego St. 4/10, 90-924 Lodz, Poland; anna.wajs-bonikowska@p.lodz.pl (A.W.-B.); radoslaw.bonikowski@p.lodz.pl (R.B.)

<sup>4</sup> Department of Allergology and Respiratory Rehabilitation, 2nd Chair of Otolaryngology Medical University of Lodz, Poland; monika.sienkiewicz@umed.lodz.pl

\* correspondence: ewa.kochan@umed.lodz.pl

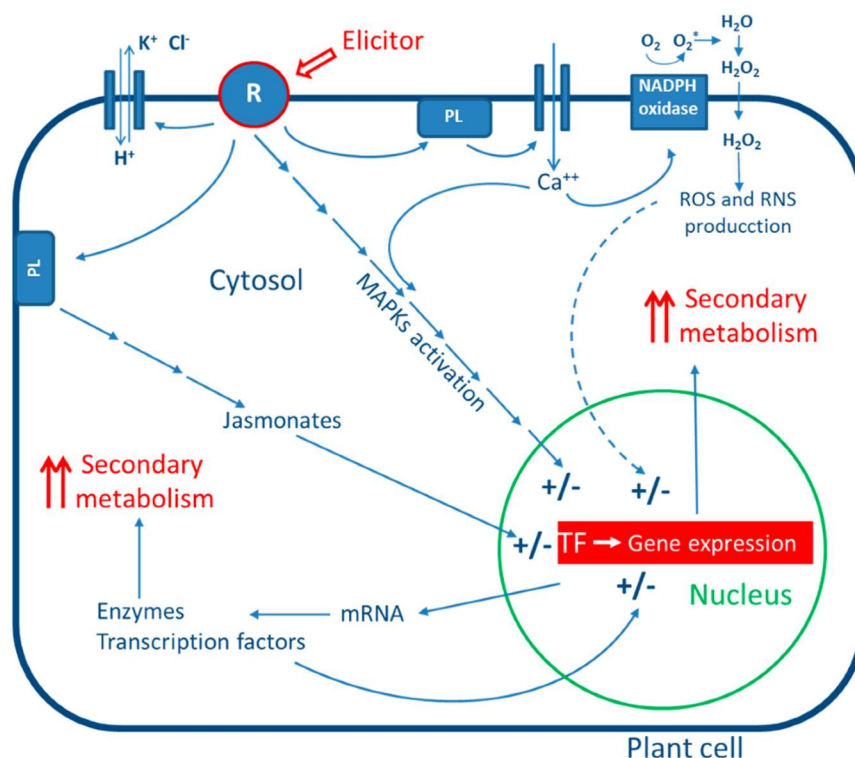

**Figure S1.** Schematic representation of the possible responses of cells to elicitation. R: receptor; PL: phospholipase; MAPKs: mitogen activated protein kinases; ROS: reactive oxygen species; RNS: reactive nitrogen species; TF: transcription factors [according to 9].
